# Supplementary material for: Arsenic-Induced SUMO-Dependent Recruitment of RNF4 into PML Nuclear Bodies
Source: PubMed Central journal article supplement — Mol Biol Cell. 2010 Dec 1;21(23):4227–39. doi: 10.1091/mbc.E10-05-0449 (PMC2993750; doi:10.1091/mbc.e10-05-0449), 2010-12-01
Supplement: E10-05-0449_1.pdf [file E10-05-0449_1.pdf]

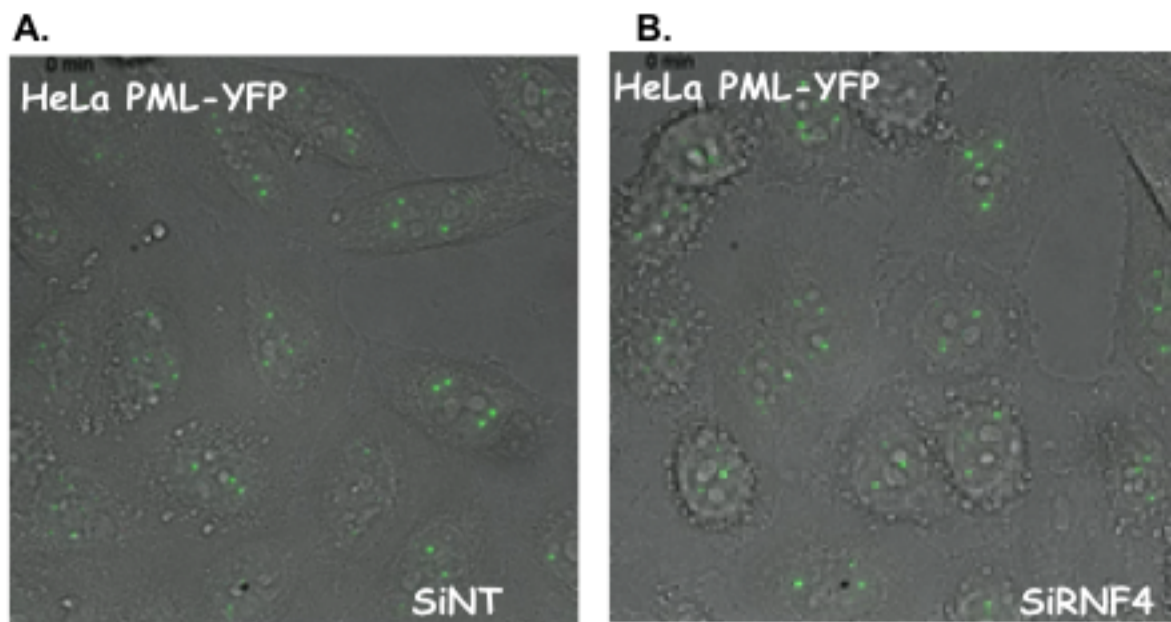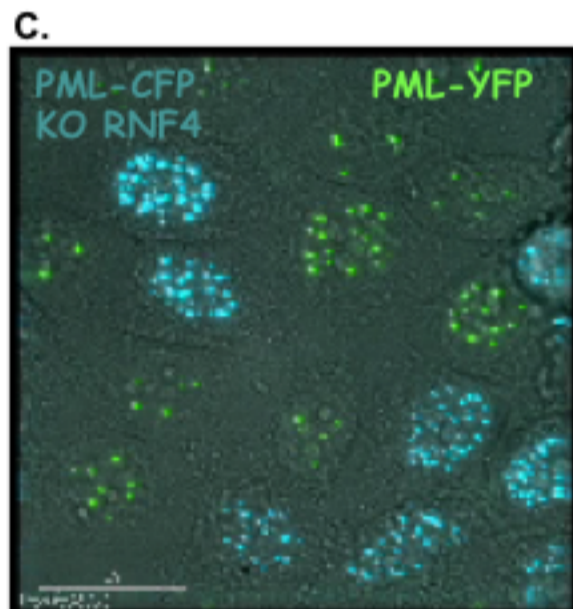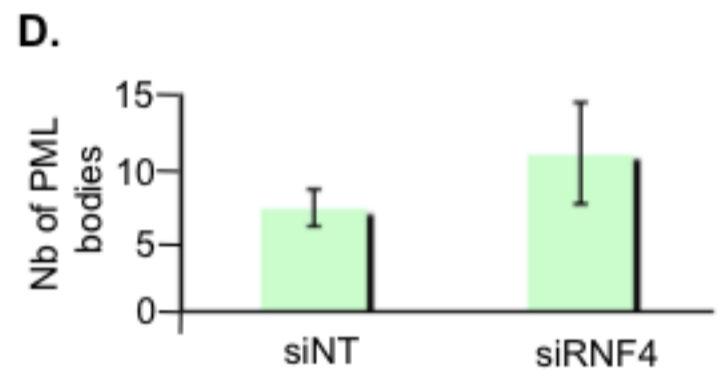

Supplemental Figure S1

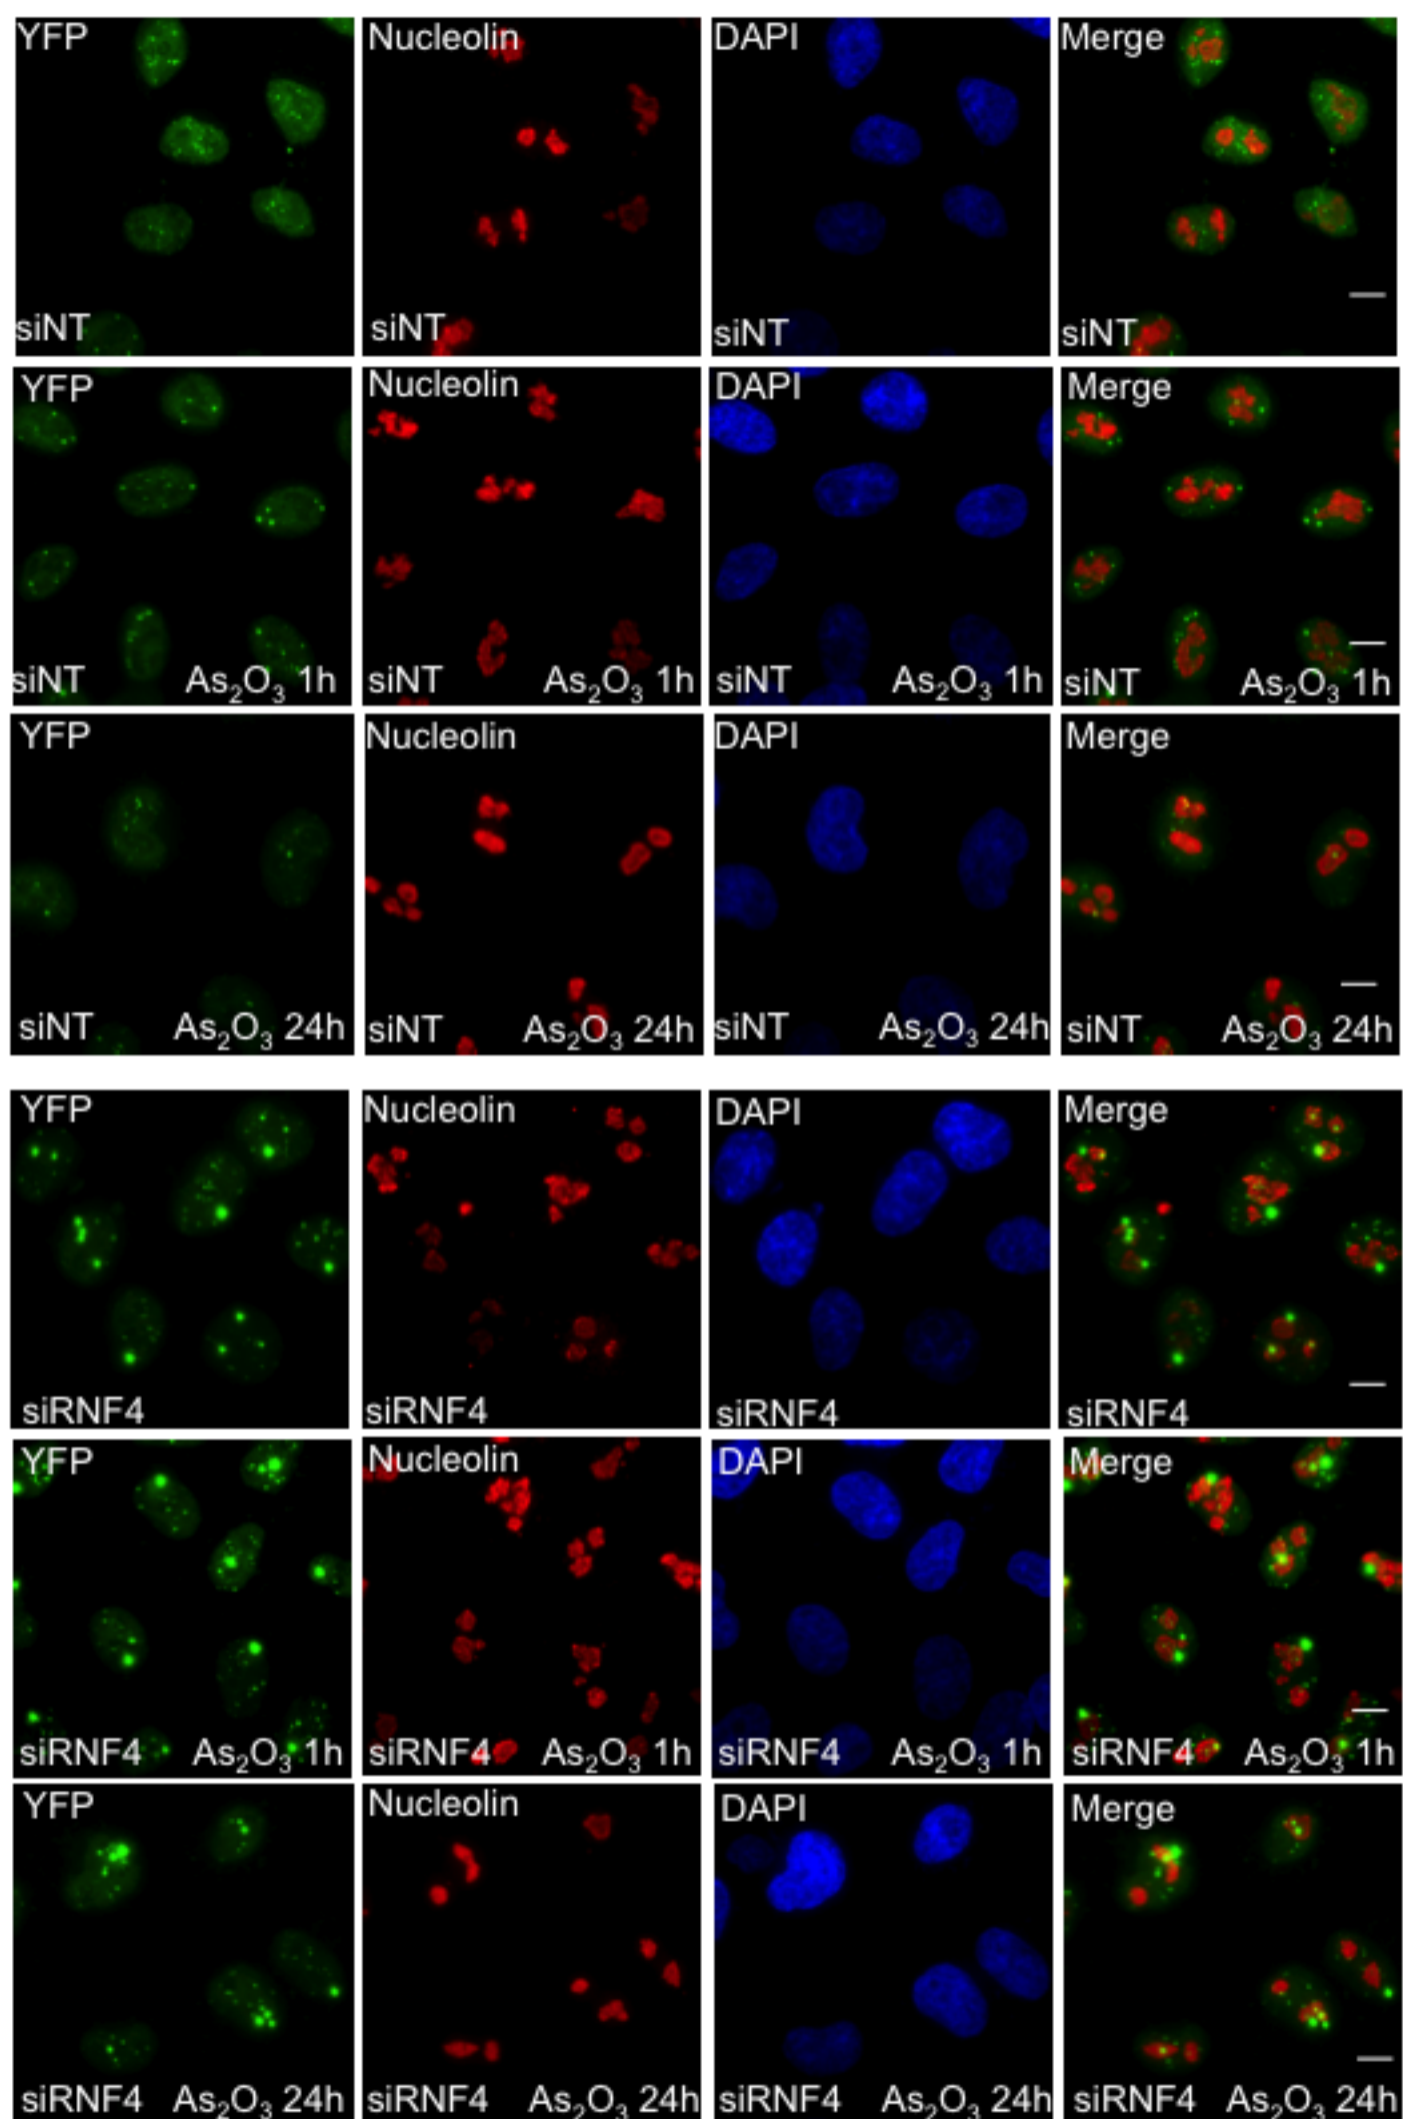

Supplementary figure S2

**A.**

RNF4-YFP wt into HeLa wt

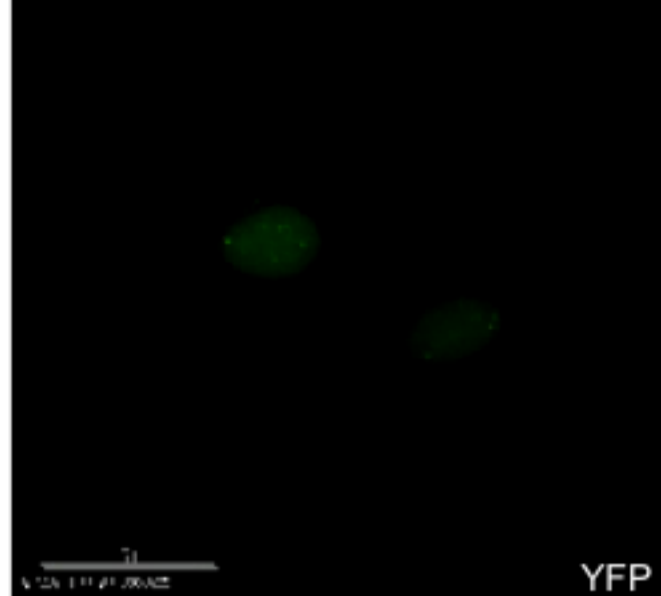**B.**RNF4 $\Delta$ SIM -YFP into HeLa wt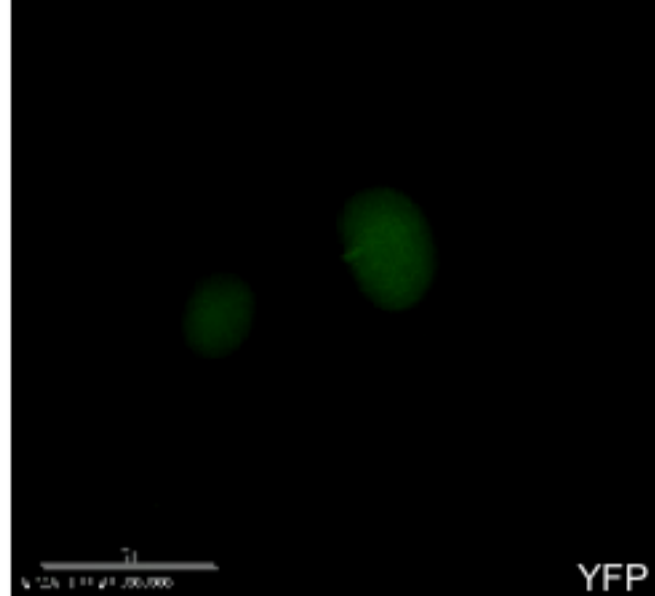**C.**

CFP-RNF4 wt into HeLa YFP-PML

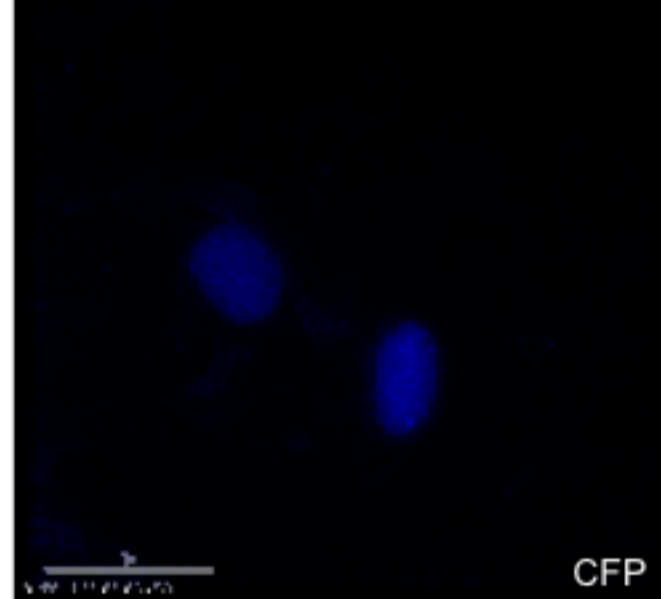**D.**

CFP-RNF4 wt into HeLa YFP-PML

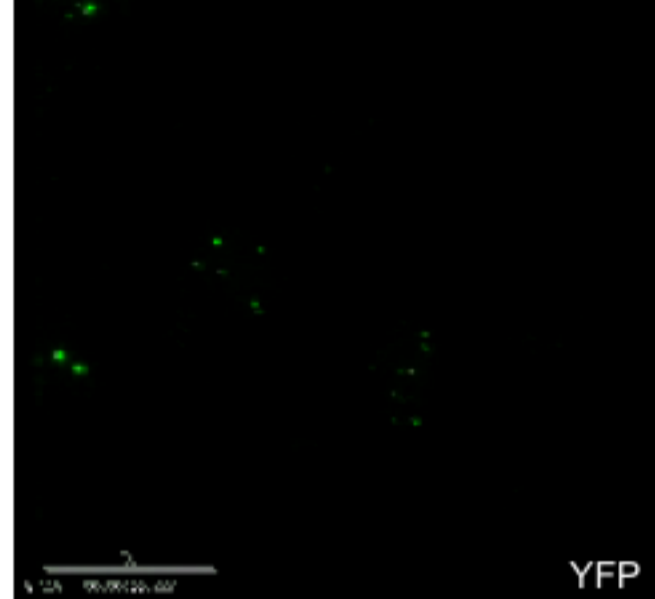**E.**

CFP-RNF4 wt into HeLa YFP-PML

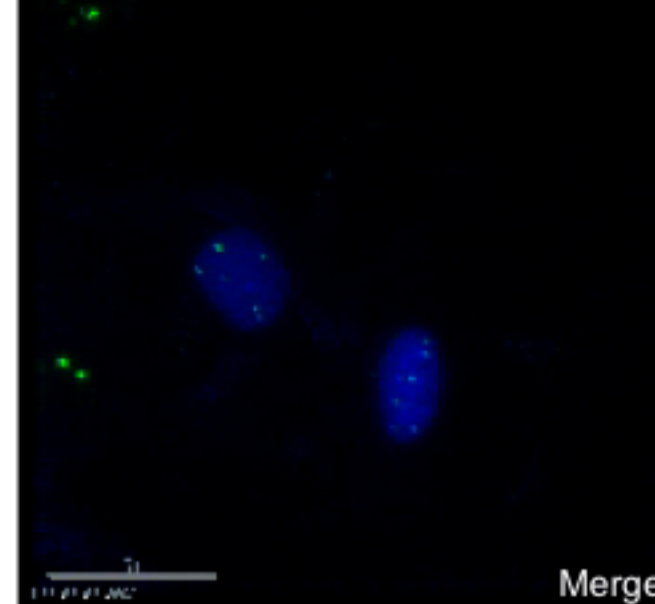

Supplementary Figure S3:
